# Supplementary material
Source: publisher figshare collection journal article supplement (https://frontiersin.figshare.com/ndownloader/files/30841291)
Supplement: Supplementary file 1 [file 30841291]

**Supplementary Information – Raw scan data repository**

Raw scan data used in this study can be found at MorphoSource:

https://www.morphosource.org/projects/000369749
